# Supplementary material for: Da Cheng Qi Decoction Alleviates Cerulein-Stimulated AR42J Pancreatic Acinar Cell Injury via the JAK2/STAT3 Signaling Pathway
Source: Hindawi journal article supplement (doi:10.1155/2021/6657036), 2021-04-09
Supplement: f1 [file 6657036.f1.zip]

|                   |             |             |             |             |             |
|-------------------|-------------|-------------|-------------|-------------|-------------|
| Fig. 4 B          | Control     | Model       | LG          | MG          | HG          |
| gray value:       | 0.604125939 | 1.0559214   | 0.881322236 | 0.974624043 | 0.804203377 |
| P/T(JAK2)         | 0.886388125 | 1.101538506 | 0.98662156  | 0.908739529 | 0.810155353 |
|                   | 0.693063592 | 1.163840788 | 0.9964313   | 0.858927011 | 0.905196165 |
| mean              | 0.727859219 | 1.107100231 | 0.954791699 | 0.914096861 | 0.839851632 |
| SD                | 0.14431229  | 0.054174239 | 0.063815196 | 0.05803427  | 0.056668223 |
| P Value(vs Model) | 0.000228    |             | 0.048301    | 0.017271    | 0.002751    |

|                   |             |             |             |             |             |
|-------------------|-------------|-------------|-------------|-------------|-------------|
|                   | Control     | Model       | LG          | MG          | HG          |
| gray value:       | 0.4084965   | 1.151587706 | 0.957795063 | 0.787303035 | 0.601902525 |
| P/T(STAT3)        | 0.528497742 | 0.907597366 | 0.759913387 | 0.765758763 | 0.700339957 |
|                   | 0.394198303 | 0.904050806 | 0.851415296 | 0.620962101 | 0.504638243 |
| mean              | 0.443730848 | 0.987745293 | 0.856374582 | 0.724674633 | 0.602293575 |
| SD                | 0.073757571 | 0.141902772 | 0.099034011 | 0.09046135  | 0.097851443 |
| P Value(vs Model) | 0.000072    |             | 0.149666    | 0.010778    | 0.001012    |

|            |             |             |             |             |
|------------|-------------|-------------|-------------|-------------|
| Fig. 5 B   | Control     | Model       | TG          | DG          |
| gray       | 0.269811    | 0.773631    | 0.815052    | 0.281939    |
| value:p-   | 0.299587    | 0.892313    | 0.478521    | 0.253777    |
| STAT3/GAPD | 0.20517     | 1.14767     | 0.635255    | 0.229998    |
| mean       | 0.258189333 | 0.937871333 | 0.642942667 | 0.255238    |
| SD         | 0.04826945  | 0.191135985 | 0.16839716  | 0.026001303 |
| P Value(vs | 0.000212    |             | 0.024204    | 0.000205    |

|            |             |             |             |             |
|------------|-------------|-------------|-------------|-------------|
|            | Control     | Model       | TG          | DG          |
| gray       | 0.127373    | 1.14478     | 0.858829    | 0.266318    |
| value:Bax/ | 0.0418142   | 0.953728    | 0.676896    | 0.522856    |
| GAPDH      | 0.072223    | 1.3727      | 0.975371    | 0.238516    |
| mean       | 0.080470067 | 1.157069333 | 0.837032    | 0.342563333 |
| SD         | 0.043371507 | 0.20975618  | 0.150426604 | 0.156755612 |
| P Value(vs | 0.000025    |             | 0.033153    | 0.00018     |

|            |             |             |             |             |
|------------|-------------|-------------|-------------|-------------|
|            | Control     | Model       | TG          | DG          |
| gray       | 1.33391     | 0.296371    | 0.660103    | 0.699378    |
| value:Bcl- | 1.08512     | 0.390566    | 0.550856    | 0.793938    |
| XL/GAPDH   | 1.13183     | 0.288544    | 0.622429    | 0.584986    |
| mean       | 1.18362     | 0.325160333 | 0.611129333 | 0.692767333 |
| SD         | 0.132233767 | 0.056778001 | 0.05549314  | 0.10463274  |
| P Value(vs | 0.000003    |             | 0.005557    | 0.001302    |

|                   |                 |                 |                 |                 |                 |
|-------------------|-----------------|-----------------|-----------------|-----------------|-----------------|
| Fig. 6 E          | Control         | Model           | FG              | SG              | TG              |
|                   | <b>0.309419</b> | <b>0.822907</b> | <b>0.272299</b> | <b>0.7387</b>   | <b>0.700836</b> |
| gray value:       | <b>0.428176</b> | <b>0.886535</b> | <b>0.22813</b>  | <b>0.710692</b> | <b>0.706905</b> |
| P/T(JAK2)         | <b>0.33989</b>  | <b>0.909484</b> | <b>0.295386</b> | <b>0.903995</b> | <b>0.746833</b> |
| mean              | 0.359161667     | 0.872975333     | 0.265271667     | 0.784462333     | 0.718191333     |
| SD                | 0.061679446     | 0.044853012     | 0.034174259     | 0.104461265     | 0.024989338     |
| P Value(vs Model) | 0.000001        |                 | 0.000001        | 0.105224        | 0.010971        |

|                   |                 |                |                 |                 |                 |
|-------------------|-----------------|----------------|-----------------|-----------------|-----------------|
|                   | Control         | Model          | FG              | SG              | TG              |
|                   | <b>0.692519</b> | <b>1.21045</b> | <b>0.550517</b> | <b>0.957979</b> | <b>1.09329</b>  |
| gray value:       | <b>0.684773</b> | <b>1.42552</b> | <b>0.55667</b>  | <b>0.806109</b> | <b>0.936441</b> |
| P/T(STAT3)        | <b>0.618946</b> | <b>1.02578</b> | <b>0.483983</b> | <b>0.857852</b> | <b>0.694072</b> |
| mean              | 0.665412667     | 1.220583333    | 0.53039         | 0.87398         | 0.907934333     |
| SD                | 0.040427261     | 0.200062566    | 0.040307221     | 0.077208863     | 0.201129872     |
| P Value(vs Model) | 0.00048         |                | 0.000088        | 0.01            | 0.01699         |

|               |                 |                 |                 |                 |
|---------------|-----------------|-----------------|-----------------|-----------------|
| Fig. 6 J      | Control         | DG              | GG              | D+GG            |
| gray value:   | <b>0.721834</b> | <b>0.635665</b> | <b>1.11973</b>  | <b>0.983136</b> |
| P/T(STAT3)    | <b>0.670028</b> | <b>0.54369</b>  | <b>1.07864</b>  | <b>0.65615</b>  |
|               | <b>0.592875</b> | <b>0.586675</b> | <b>0.907605</b> | <b>0.825467</b> |
| mean          | 0.661579        | 0.588676667     | 1.035325        | 0.821584333     |
| SD            | 0.064893336     | 0.04602016      | 0.112500648     | 0.163527574     |
| P Value(vs GC | 0.002683        | 0.000911        |                 | 0.040038        |
